# Supplementary material for: Randomized, Double‐Blind, Placebo‐Controlled Phase II Study of Yeast‐Brachyury Vaccine (GI‐6301) in Combination with Standard‐of‐Care Radiotherapy in Locally Advanced, Unresectable Chordoma
Source: PubMed Central journal article supplement — Oncologist. 2021 Mar 9;26(5):e847–58. doi: 10.1002/onco.13720 (PMC8100546; doi:10.1002/onco.13720), 2021-03-09
Supplement: ONCO-26-e847-s001.pdf [file ONCO-26-e847-s001.pdf]

Supplemental Figures for:  
Phase II Study of Yeast-Brachyury Vaccine (GI-6301) in Combination with Standard-of-Care Radiotherapy in Locally Advanced, Unresectable Chordoma  
James Gulley et al.

**Figure S1. Study schema.** Following randomization, blinded vaccine was administered on cycle 1 days 1, 15, and 29. After completing the first cycle of treatment, proton or photon RT was given at the discretion of the patient’s local radiation oncologist. Post-RT, patients returned to the NIH Clinical Center where they continued to receive blinded vaccine until progression.

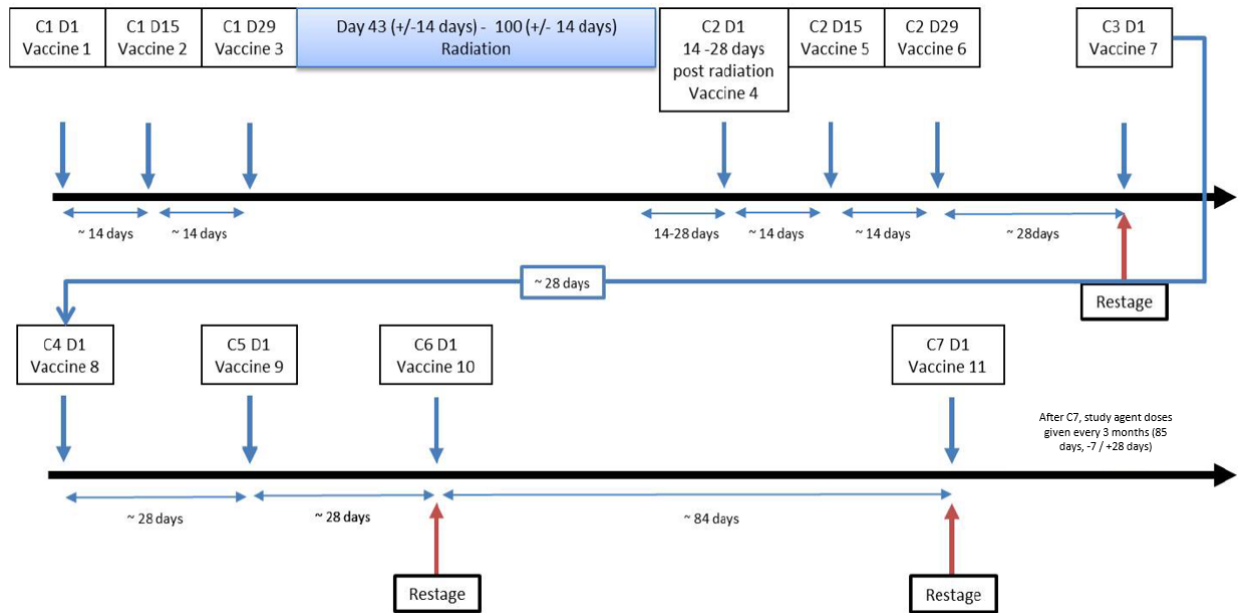

Supplemental Figures for:  
 Phase II Study of Yeast-Brachyury Vaccine (GI-6301) in Combination with Standard-of-Care Radiotherapy in Locally Advanced, Unresectable Chordoma  
 James Gulley et al.

**Figure S2. Tumor Response per RECIST 1.1.** This spider plot of RECIST v1.1 measurement data shows percentage change in the targeted lesion sum over time, represented by cycle number. Patients on the vaccine arm are shown in green; patients on the placebo arm are shown in red. No observable trend is identified.

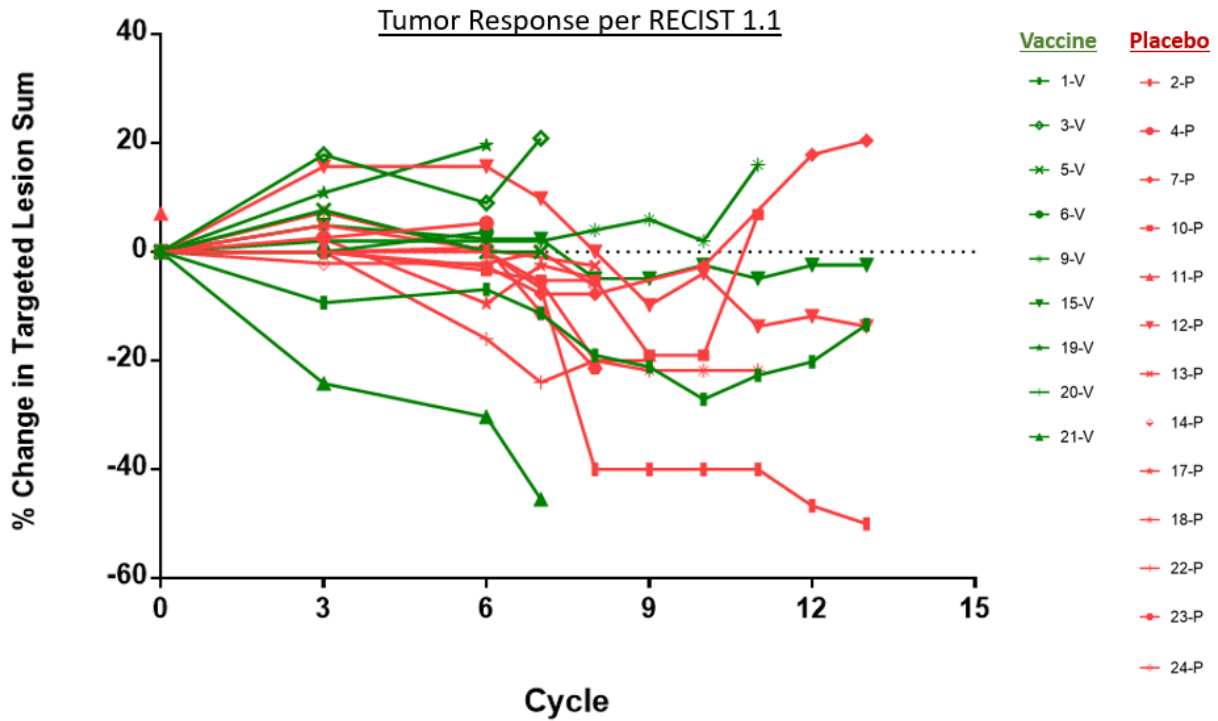

Supplemental Figures for:  
Phase II Study of Yeast-Brachyury Vaccine (GI-6301) in Combination with Standard-of-Care Radiotherapy in Locally Advanced, Unresectable Chordoma  
James Gulley et al.

**Figure S3. 2D RECIST vs 3D Volumetric Measurement of Chordomas.** Comparison of 2-dimensional (RECIST) and 3-dimensional volumetric tumor measurement. Images of sacrococcygeal chordoma from patient who developed partial response on vaccine arm.

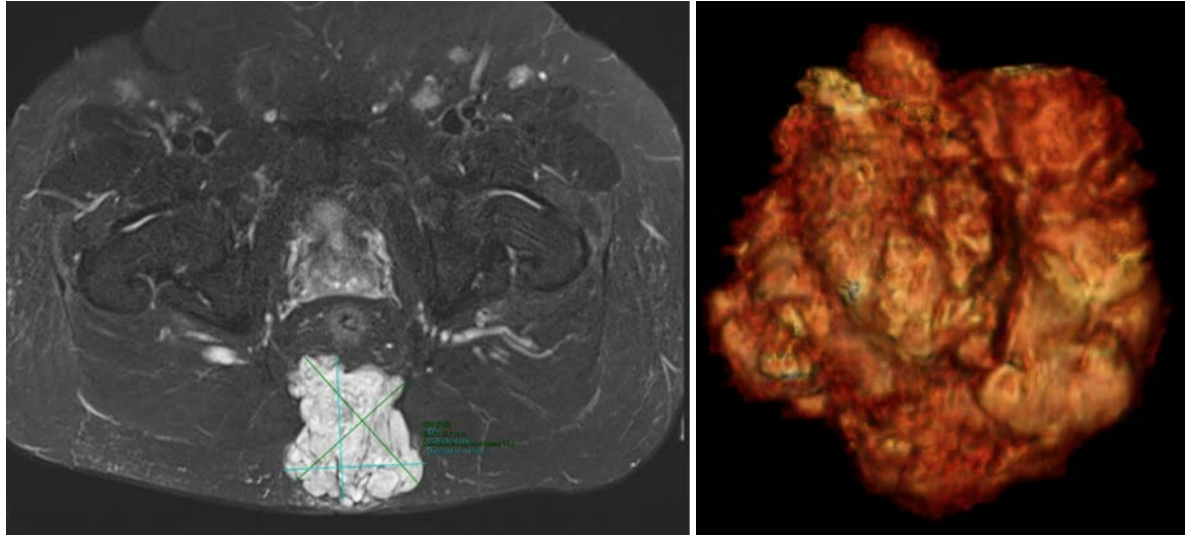

Supplemental Figures for:  
Phase II Study of Yeast-Brachyury Vaccine (GI-6301) in Combination with Standard-of-Care Radiotherapy in Locally Advanced, Unresectable Chordoma  
James Gulley et al.

**Figure S4. Immune analysis of patient level antigen-specific data.** Absolute number of CD4+ or CD8+ T cells producing cytokine (IFN $\gamma$ , TNF $\alpha$ , IL-2) or positive for CD107a per  $1 \times 10^6$  PBMCs plated at the start of the in vitro stimulation assay. Numbers in bold are positive responses after vs before therapy and following subtraction of background [TAA after therapy – HLA after therapy] – [TAA before therapy – HLA before therapy] >250 per  $1 \times 10^6$  PBMCs. Grey rows indicate time points at which PBMCs were insufficient for analysis. In the current study, antigen-specific responses fluctuated in many patients over time. This phenomenon has been observed in numerous cancer vaccine trials [41-45] and may be due to T-cell trafficking into and out of the tumor, as well as homeostatic regulation by regulatory T cells to suppress an immune response against self-antigens.

| Treatment | BOR | Post # of vaccines or placebo (vs pre) | Immune Responses to Brachyury |                  |          |         |            |                  |          |         | Immune Responses to MUC1 |                  |          |         |            |                  |          |         | Immune Responses to CEA |                  |          |         |            |                  |          |         |   |
|-----------|-----|----------------------------------------|-------------------------------|------------------|----------|---------|------------|------------------|----------|---------|--------------------------|------------------|----------|---------|------------|------------------|----------|---------|-------------------------|------------------|----------|---------|------------|------------------|----------|---------|---|
|           |     |                                        | CD4 CD107a                    | CD4 IFN $\gamma$ | CD4 IL-2 | CD4 TNF | CD8 CD107a | CD8 IFN $\gamma$ | CD8 IL-2 | CD8 TNF | CD4 CD107a               | CD4 IFN $\gamma$ | CD4 IL-2 | CD4 TNF | CD8 CD107a | CD8 IFN $\gamma$ | CD8 IL-2 | CD8 TNF | CD4 CD107a              | CD4 IFN $\gamma$ | CD4 IL-2 | CD4 TNF | CD8 CD107a | CD8 IFN $\gamma$ | CD8 IL-2 | CD8 TNF |   |
| GI-6301   | PR  | 2                                      | 0                             | 0                | 1089     | 979     | 0          | 0                | 0        | 0       | 0                        | 0                | 0        | 0       | 0          | 0                | 0        | 0       | 0                       | 0                | 150      | 352     | 609        | 374              | 0        | 0       |   |
|           |     | 3                                      | 0                             | 0                | 0        | 0       | 0          | 0                | 0        | 0       | 0                        | 0                | 0        | 0       | 0          | 0                | 0        | 0       | 0                       | 0                | 0        | 0       | 0          | 0                | 0        | 0       |   |
|           |     | 9                                      | 0                             | 0                | 0        | 0       | 0          | 0                | 0        | 0       | 0                        | 0                | 0        | 0       | 0          | 0                | 0        | 0       | 0                       | 0                | 0        | 0       | 0          | 0                | 0        | 0       |   |
| GI-6301   | SD  | 2                                      | 0                             | 0                | 356      | 515     | 472        | 564              | 35       | 1852    | 0                        | 2077             | 1726     | 2598    | 1119       | 859              | 52       | 777     | 0                       | 0                | 0        | 0       | 0          | 0                | 0        | 0       |   |
|           |     | 3                                      | 0                             | 1531             | 1365     | 1206    | 1169       | 195              | 0        | 1386    | 357                      | 0                | 0        | 0       | 0          | 0                | 720      | 0       | 1467                    | 0                | 0        | 0       | 0          | 0                | 270      | 0       | 0 |
|           |     | 9                                      | 3926                          | 205              | 1268     | 6159    | 751        | 0                | 0        | 3393    | 545                      | 0                | 0        | 0       | 3848       | 198              | 141      | 3052    | 954                     | 0                | 0        | 0       | 0          | 0                | 0        | 0       |   |
| GI-6301   | SD  | 2                                      | 0                             | 0                | 296      | 432     | 0          | 0                | 0        | 1236    | 0                        | 0                | 0        | 0       | 0          | 0                | 0        | 613     | 664                     | 650              | 0        | 0       | 0          | 0                | 101      | 515     |   |
|           |     | 3                                      | 0                             | 201              | 1094     | 1138    | 4696       | 1363             | 0        | 0       | 0                        | 0                | 692      | 80      | 0          | 0                | 0        | 0       | 0                       | 2289             | 3606     | 3881    | 0          | 0                | 0        | 0       |   |
|           |     | 9                                      | 0                             | 0                | 0        | 294     | 0          | 0                | 0        | 0       | 0                        | 0                | 0        | 0       | 0          | 0                | 0        | 0       | 0                       | 0                | 0        | 0       | 0          | 0                | 0        | 0       |   |
| GI-6301   | SD  | 2                                      | 0                             | 0                | 0        | 0       | 0          | 0                | 0        | 0       | 0                        | 0                | 0        | 0       | 0          | 0                | 0        | 0       | 0                       | 0                | 0        | 0       | 0          | 0                | 9        | 0       |   |
|           |     | 3                                      | 203                           | 754              | 0        | 0       | 0          | 147              | 0        | 0       | 0                        | 0                | 0        | 0       | 0          | 0                | 0        | 0       | 0                       | 0                | 0        | 0       | 0          | 0                | 0        | 0       |   |
|           |     | 9                                      | 0                             | 0                | 150      | 312     | 0          | 0                | 0        | 0       | 0                        | 0                | 21       | 0       | 0          | 0                | 0        | 34      | 0                       | 0                | 0        | 0       | 0          | 0                | 0        | 0       |   |
| GI-6301   | PD  | 2                                      | 0                             | 408              | 0        | 0       | 0          | 1066             | 0        | 617     | 0                        | 514              | 445      | 617     | 0          | 145              | 0        | 0       | 0                       | 0                | 0        | 0       | 0          | 0                | 38       | 1120    |   |
|           |     | 3                                      | 0                             | 828              | 0        | 0       | 0          | 171              | 0        | 0       | 0                        | 0                | 0        | 0       | 0          | 0                | 0        | 0       | 0                       | 0                | 379      | 324     | 0          | 0                | 24       | 0       |   |
|           |     | 9                                      | 0                             | 204              | 0        | 0       | 0          | 306              | 41       | 0       | 0                        | 277              | 0        | 0       | 0          | 0                | 0        | 0       | 0                       | 0                | 0        | 0       | 0          | 0                | 0        | 0       |   |
| GI-6301   | PD  | 2                                      | 0                             | 0                | 0        | 0       | 0          | 0                | 0        | 0       | 0                        | 31               | 0        | 0       | 0          | 0                | 0        | 456     | 1112                    | 2321             | 342      | 1412    | 3347       | 9541             | 14       | 2308    |   |
|           |     | 3                                      | 0                             | 775              | 1613     | 2595    | 11418      | 5253             | 6        | 5668    | 0                        | 0                | 0        | 0       | 4798       | 4255             | 0        | 4462    | 0                       | 1753             | 2623     | 2441    | 0          | 0                | 0        | 2962    |   |
|           |     | 9                                      | 0                             | 0                | 0        | 0       | 0          | 0                | 0        | 0       | 308                      | 282              | 0        | 104     | 0          | 466              | 0        | 581     | 0                       | 1092             | 293      | 829     | 8659       | 10999            | 52       | 6468    |   |
| GI-6301   | PD  | 2                                      | 0                             | 0                | 0        | 0       | 0          | 0                | 0        | 0       | 0                        | 0                | 0        | 0       | 0          | 0                | 0        | 0       | 0                       | 0                | 0        | 0       | 0          | 0                | 15       | 383     |   |
|           |     | 3                                      | 0                             | 0                | 0        | 0       | 0          | 0                | 10       | 0       | 394                      | 47               | 0        | 1298    | 0          | 0                | 0        | 0       | 0                       | 0                | 0        | 0       | 0          | 0                | 0        | 0       |   |
|           |     | 9                                      | 0                             | 0                | 667      | 0       | 0          | 0                | 4        | 0       | 0                        | 0                | 0        | 0       | 0          | 0                | 2        | 0       | 0                       | 0                | 0        | 0       | 0          | 0                | 0        | 7       |   |
| GI-6301   | PD  | 2                                      | 0                             | 0                | 0        | 0       | 0          | 0                | 0        | 0       | 0                        | 0                | 0        | 0       | 0          | 0                | 0        | 0       | 0                       | 0                | 0        | 0       | 0          | 0                | 0        | 0       |   |
|           |     | 3                                      | 0                             | 0                | 0        | 583     | 0          | 0                | 0        | 0       | 0                        | 0                | 3518     | 2768    | 0          | 0                | 0        | 0       | 0                       | 0                | 0        | 288     | 0          | 0                | 0        | 0       |   |
|           |     | 9                                      | 0                             | 0                | 753      | 763     | 0          | 0                | 0        | 693     | 0                        | 1573             | 2506     | 2316    | 2091       | 0                | 0        | 0       | 0                       | 0                | 0        | 188     | 318        | 0                | 0        | 0       |   |
| Placebo   | PR  | 2                                      | 492                           | 101              | 228      | 127     | 0          | 202              | 0        | 0       | 0                        | 0                | 63       | 101     | 0          | 0                | 37       | 502     | 2149                    | 0                | 116      | 278     | 1061       | 0                | 50       | 359     |   |
|           |     | 3                                      | 429                           | 1028             | 0        | 155     | 0          | 422              | 0        | 0       | 0                        | 2083             | 360      | 488     | 0          | 590              | 21       | 425     | 369                     | 334              | 0        | 163     | 105        | 24               | 15       | 234     |   |
|           |     | 9                                      | 0                             | 0                | 0        | 0       | 0          | 8                | 17       | 0       | 0                        | 0                | 0        | 0       | 0          | 0                | 0        | 0       | 0                       | 0                | 0        | 0       | 0          | 0                | 3        | 0       |   |
| Placebo   | SD  | 2                                      | 839                           | 121              | 369      | 67      | 240        | 59               | 0        | 490     | 1449                     | 0                | 378      | 68      | 0          | 0                | 0        | 0       | 0                       | 0                | 31       | 260     | 0          | 0                | 0        | 14      |   |
|           |     | 3                                      | 555                           | 580              | 0        | 501     | 1475       | 183              | 0        | 609     | 1833                     | 0                | 611      | 0       | 0          | 0                | 30       | 0       | 574                     | 0                | 0        | 369     | 0          | 0                | 0        | 0       |   |
|           |     | 9                                      | 452                           | 0                | 0        | 0       | 0          | 2                | 0        | 0       | 331                      | 0                | 0        | 0       | 0          | 0                | 4        | 0       | 0                       | 234              | 0        | 0       | 0          | 0                | 0        | 6       |   |
| Placebo   | SD  | 2                                      | 0                             | 1217             | 1867     | 10114   | 5806       | 1325             | 102      | 1270    | 2053                     | 0                | 0        | 0       | 726        | 63               | 0        | 0       | 0                       | 2052             | 0        | 1584    | 280        | 6                | 88       | 0       |   |
|           |     | 3                                      | 0                             | 0                | 0        | 0       | 127        | 0                | 30       | 0       | 0                        | 0                | 0        | 0       | 0          | 0                | 0        | 0       | 23                      | 271              | 0        | 0       | 0          | 70               | 0        | 0       |   |
|           |     | 9                                      | 0                             | 618              | 0        | 0       | 0          | 0                | 0        | 0       | 0                        | 0                | 0        | 0       | 0          | 0                | 11       | 0       | 0                       | 0                | 0        | 0       | 81         | 0                | 0        | 129     |   |
| Placebo   | SD  | 2                                      | 2141                          | 56677            | 4078     | 56974   | 3569       | 1510             | 127      | 2333    | 0                        | 0                | 0        | 151     | 924        | 53               | 0        | 861     | 0                       | 0                | 0        | 0       | 0          | 0                | 0        | 33      |   |
|           |     | 3                                      | 2320                          | 15357            | 951      | 14457   | 0          | 165              | 0        | 337     | 0                        | 0                | 0        | 0       | 1268       | 0                | 518      | 0       | 0                       | 473              | 0        | 3880    | 446        | 455              | 64       | 1108    |   |
|           |     | 9                                      | 0                             | 0                | 0        | 0       | 0          | 0                | 0        | 0       | 0                        | 0                | 0        | 0       | 0          | 0                | 5        | 0       | 1470                    | 182              | 0        | 369     | 0          | 0                | 24       | 0       |   |
| Placebo   | SD  | 2                                      | 0                             | 0                | 73       | 262     | 0          | 0                | 0        | 0       | 0                        | 0                | 0        | 0       | 0          | 1                | 0        | 0       | 0                       | 0                | 0        | 0       | 0          | 0                | 0        | 0       |   |
|           |     | 3                                      | 0                             | 1926             | 576      | 1686    | 2734       | 886              | 24       | 4750    | 0                        | 0                | 0        | 0       | 896        | 0                | 11       | 0       | 0                       | 0                | 0        | 0       | 0          | 0                | 5        | 0       |   |
|           |     | 9                                      | 0                             | 0                | 0        | 0       | 0          | 0                | 0        | 0       | 0                        | 0                | 0        | 0       | 0          | 0                | 0        | 0       | 0                       | 0                | 0        | 0       | 0          | 0                | 0        | 0       |   |
| Placebo   | PD  | 2                                      | 0                             | 0                | 0        | 0       | 0          | 0                | 0        | 0       | 0                        | 0                | 0        | 0       | 0          | 0                | 0        | 0       | 0                       | 0                | 0        | 0       | 0          | 0                | 0        | 0       |   |
|           |     | 3                                      | 0                             | 0                | 0        | 301     | 13033      | 0                | 0        | 6313    | 957                      | 0                | 0        | 212     | 16207      | 0                | 0        | 8505    | 0                       | 2513             | 0        | 1968    | 20415      | 12563            | 0        | 10362   |   |
|           |     | 9                                      | 21453                         | 369              | 0        | 578     | 47998      | 15912            | 0        | 23782   | 0                        | 0                | 0        | 0       | 0          | 0                | 0        | 0       | 0                       | 26               | 0        | 917     | 0          | 0                | 0        | 0       |   |
| Placebo   | PD  | 2                                      | 0                             | 2192             | 0        | 728     | 0          | 0                | 0        | 0       | 0                        | 0                | 0        | 0       | 0          | 0                | 0        | 0       | 0                       | 0                | 0        | 0       | 0          | 0                | 0        | 0       |   |
|           |     | 3                                      | 0                             | 1274             | 1957     | 1338    | 0          | 0                | 0        | 1391    | 0                        | 0                | 1943     | 740     | 0          | 0                | 0        | 0       | 117                     | 1158             | 770      | 1192    | 0          | 0                | 0        | 0       |   |
|           |     | 9                                      | 0                             | 1375             | 0        | 1162    | 7          | 0                | 0        | 1475    | 0                        | 0                | 0        | 0       | 0          | 0                | 0        | 0       | 0                       | 0                | 0        | 0       | 0          | 0                | 0        | 0       |   |
| Placebo   | PD  | 2                                      | 0                             | 0                | 0        | 0       | 0          | 0                | 0        | 0       | 0                        | 0                | 0        | 0       | 0          | 0                | 0        | 0       | 0                       | 0                | 0        | 0       | 0          | 0                | 0        | 0       |   |
|           |     | 3                                      | 1148                          | 0                | 0        | 0       | 0          | 0                | 49       | 0       | 0                        | 0                | 0        | 0       | 0          | 0                | 0        | 0       | 0                       | 0                | 0        | 0       | 0          | 0                | 37       | 0       |   |
|           |     | 9                                      | 0                             | 1058             | 0        | 626     | 0          | 0                | 0        | 0       | 0                        | 0                | 0        | 0       | 0          | 0                | 0        | 0       | 0                       | 0                | 0        | 0       | 0          | 0                | 0        | 0       |   |
| Placebo   | PD  | 2                                      | 961                           | 0                | 1347     | 1648    | 3082       | 0                | 0        | 0       | 0                        | 0                | 0        | 0       | 799        | 0                | 1239     | 0       | 267                     | 0                | 0        | 0       | 474        | 0                | 0        | 0       |   |
|           |     | 3                                      | 640                           | 0                | 0        | 0       | 0          | 0                | 0        | 0       | 1333                     | 928              | 305      | 546     | 1500       | 583              | 0        | 2238    | 834                     | 110              | 459      | 0       | 1874       | 553              | 92       | 1631    |   |
|           |     | 9                                      | 0                             | 0                | 0        | 0       | 0          | 0                | 0        | 0       | 0                        | 0                | 0        | 0       | 0          | 0                | 0        | 0       | 0                       | 0                | 0        | 0       | 0          | 0                | 0        | 0       |   |
| Placebo   | PD  | 2                                      | 181                           | 0                | 0        | 0       | 0          | 0                | 0        | 45      | 0                        | 0                | 0        | 0       | 0          | 0                | 0        | 0       | 388                     | 100              | 0        | 0       | 133        | 30               | 0        | 0       |   |
|           |     | 3                                      | 1505                          | 0                | 0        | 0       | 0          | 0                | 0        | 858     | 0                        | 0                | 0        | 0       | 0          | 0                | 0        | 0       | 2032                    | 53               | 0        | 0       | 994        | 112              | 0        | 758     |   |
|           |     | 9                                      | 0                             | 0                | 0        | 0       | 0          | 0                | 0        | 0       | 0                        | 0                | 0        | 0       | 0          | 25               | 0        | 0       | 0                       | 0                | 0        | 0       | 0          | 0                | 0        | 2369    |   |
| Placebo   | PD  | 2                                      | 0                             | 1910             | 342      | 0       | 0          | 0                | 0        | 0       | 5024                     | 0                | 0        | 0       | 0          | 0                | 0        | 0       | 0                       | 0                | 0        | 0       | 0          | 0                | 0        | 0       |   |
|           |     | 3                                      | 0                             | 0                | 0        | 0       | 0          | 0                | 0        | 0       | 0                        | 258              | 0        | 0       | 0          | 2336             | 40       | 0       | 0                       | 0                | 0        | 0       | 0          | 0                | 36       | 0       |   |
|           |     | 9                                      | 0                             | 0                | 0        | 0       | 0          | 338              | 1        | 0       | 0                        | 0                | 0        | 0       | 0          | 0                | 62       | 0       | 0                       | 0                | 0        | 0       | 0          | 0                | 0        | 0       |   |
| Placebo   | PD  | 2                                      | 0                             | 1919             | 1423     | 5146    | 0          | 0                | 0        | 0       | 0                        | 0                | 147      | 0       | 0          | 0                | 0        | 0       | 0                       | 0                | 0        | 0       | 0          | 0                | 35       | 0       |   |
|           |     | 3                                      | 0                             | 0                | 0        | 0       | 0          | 0                | 0        | 0       | 0                        | 794              | 345      | 0       | 0          | 0                | 0        | 0       | 0                       | 0                | 0        | 0       | 0          | 0                | 0        | 0       |   |
|           |     | 9                                      | 0                             | 0                | 0        | 0       | 0          | 0                | 0        | 0       | 2758                     | 2476             | 6398     | 3209    | 4340       | 772              | 0        | 740     | 0                       | 0                | 0        | 0       | 0          | 0                | 0        | 0       |   |
| Placebo   | PD  | 2                                      | 0                             | 0                | 0        | 0       | 310        | 0                | 0        | 0       | 0                        | 0                | 0        | 0       | 0          | 0                | 0        | 0       | 0                       | 0                | 0        | 0       | 0          | 0                | 0        | 0       |   |
|           |     | 3                                      | 0                             | 486              | 0        | 0       | 0          | 170              | 0        | 0       | 0                        | 0                | 0        | 0       | 0          | 0                | 0        | 0       | 0                       | 0                | 0        | 0       | 0          | 0                | 0        | 0       |   |
|           |     | 9                                      | 0                             | 59               | 352      | 0       | 563        | 0                | 9        | 0       | 0                        | 0                | 423      | 0       | 0          | 0                | 0        | 0       | 157454                  | 97495            | 73173    | 100511  | 141687     | 57659            | 0        | 26854   |   |
